# Supplementary material for: A single centre prospective study of three device-assisted therapies for Parkinson’s disease
Source: PubMed Central journal article supplement (PMC10310730; doi:10.1038/s41531-023-00525-w), 2023-06-29
Supplement: 41531_2023_525_MOESM1_ESM.pdf [file 41531_2023_525_MOESM1_ESM.pdf]

## Supplementary material

### Adverse drug event or device related events during the 12-months follow-up

|                                                          | APO | STN-DBS | LCIG | Total cohort<br>(n=63) |
|----------------------------------------------------------|-----|---------|------|------------------------|
| <b>Patients with at least one side effect</b>            | 11  | 20      | 9    | 44                     |
| Deaths                                                   | 0   | 0       | 0    | 0                      |
| Chronic problematic orthostatic hypotension or dizziness | 0   | 0       | 0    | 0                      |
| New onset polyneuropathy                                 | 0   | 0       | 0    | 0                      |
| Weight loss                                              | 0   | 0       | 0    | 0                      |
| Chronic abdominal pain                                   | 0   | 0       | 0    | 0                      |
| <b>Non-motor related side effects</b>                    |     |         |      |                        |
| Hallucinations                                           | 1   | 1       | 1    | 3                      |
| Depression                                               | 0   | 1       | 0    | 1                      |
| Apathy                                                   | 0   | 3       | 0    | 3                      |
| Impulse control disorder                                 | 3   | 0       | 1    | 4                      |
| Insomnia                                                 | 1   | 0       | 0    | 1                      |
| Increase in RBD                                          | 0   | 2       | 0    | 2                      |
| Excessive daytime somnolence                             | 2   | 0       | 0    | 2                      |
| Anxiety                                                  | 1   | 1       | 0    | 2                      |
| Cognitive change                                         | 1   | 0       | 2    | 3                      |
| Dopamine agonist withdrawal syndrome                     | 1   | 0       | 0    | 1                      |
| Headache                                                 | 0   | 1       | 0    | 1                      |
| <b>Motor related side effects</b>                        |     |         |      |                        |
| Troublesome dyskinesia                                   | 1   | 0       | 0    | 1                      |
| Non-troublesome dyskinesia                               | 0   | 1       | 2    | 3                      |
| Falls                                                    | 0   | 1       | 0    | 1                      |
| Gait problem                                             | 0   | 1       | 0    | 1                      |
| Speech problems                                          | 0   | 4       | 0    | 4                      |
| Freezing of gait                                         | 2   | 3       | 1    | 6                      |
| Exacerbation of Parkinsonism                             | 2   | 0       | 0    | 2                      |
| <b>Device related</b>                                    |     |         |      |                        |
| Complication of device insertion                         | 0   | 0       | 0    | 0                      |
| Device related infection                                 | 0   | 0       | 0    | 0                      |
| Postoperative wound infection                            | 0   | 0       | 0    | 0                      |
| Device dislocation                                       | 0   | 0       | 0    | 0                      |
| Device occlusion                                         | 0   | 0       | 0    | 0                      |
| Device issue                                             | 0   | 1       | 0    | 1                      |
| Excessive granulation tissue                             | 0   | 0       | 2    | 3                      |
| Local skin reaction                                      | 0   | 0       | 0    | 0                      |

**STN-DBS stimulation parameters at 12-months**

| ID  |                                              |
|-----|----------------------------------------------|
| 001 | L STN 1-/C+ 2.9v/60us/130Hz/1517Ω/1.9mA      |
|     | R STN 10-/C+ 3.2v/60us/130Hz/1252Ω/2.5mA     |
| 002 | L STN 2-/C+ 2.3v/120us/70Hz/1513Ω/1.5mA      |
|     | R STN 10-/C+ 2.3v/120us/70Hz/1209Ω/1.9mA     |
| 004 | L STN 1-/C+ 2.5v/60us/130Hz/1355Ω/1.9mA      |
|     | R STN 9-/C+ 2.0v/60us/130Hz/1375Ω/1.5mA      |
| 014 | L STN 2-/C+ 3.7v/60us/130Hz/975Ω/3.8mA       |
|     | R STN 10-/C+ 3.5v/60us/130Hz/981Ω/3.5mA      |
| 015 | L STN 1-/C+ 4.5v/120us/70Hz/1149Ω/3.9mA      |
|     | R STN 9-/C+ 2.5v/90us/70Hz/1237Ω/2.0mA       |
| 020 | L STN 1-/C+ 2.9v/60us/130Hz/1307Ω/2.2mA      |
|     | R STN 10-/C+ 2.9v/60us/130Hz/1134Ω/2.6mA     |
| 028 | L STN 1-/C+ 2.7v/60us/130Hz/1255Ω/2.2mA      |
|     | R STN 9-/C+ 4.3v/70us/130Hz/1262Ω/3.5mA      |
| 029 | L STN 1-/C+ 3.2v/60us/130Hz/1174Ω/2.7mA      |
|     | R STN 9-/C+ 3.1v/60us/130Hz/1328Ω/2.4mA      |
| 033 | L STN 1-/C+ 4.0v/60us/130Hz/1089Ω/3.7mA      |
|     | R STN 9-/C+ 0.7v/60us/130Hz/1584Ω/0.4mA      |
| 040 | L STN 2-/C+ 2.3v/60us/130Hz/1518Ω/1.5mA      |
|     | R STN 10-/C+ 3.1v/60us/130Hz/1123Ω/2.8mA     |
| 046 | L STN 1-/C+ 4.1v/60us/130Hz/1134Ω/3.7mA      |
|     | R STN 9-/C+ 0.0v/60us/130Hz/----Ω/---mA      |
| 047 | L STN 2-/C+ 1.1v/60us/130Hz/1775Ω/0.6mA      |
|     | R STN 10-/C+ 2.6v/60us/130Hz/1212Ω/2.2mA     |
| 049 | L STN 0-/C+ 2.8v/60us/130Hz/1186Ω/2.4mA      |
|     | R STN 8-/C+ 3.3v/60us/130Hz/1144Ω/2.9mA      |
| 050 | L STN 1-/C+ 2.1v/60us/130Hz/1314Ω/1.6mA      |
|     | R STN 10-/C+ 2.3v/60us/130Hz/1317Ω/1.7mA     |
| 056 | L STN 1 0-/C+ 2.90v/60us/125Hz/1111 Ω/2.6mA  |
|     | L STN 2 3-/C+ 1.50v/60us/125Hz/1179 Ω/1.2mA  |
|     | R STN 2 11-/C+ 1.50v/60us/125Hz/1102 Ω/1.3mA |
|     | R STN 1 9-/C+ 2.30v/60us/125Hz/1102 Ω/2.2mA  |
| 060 | L STN 1-/C+ 2.7v/60us/130Hz/1037Ω/2.6mA      |
|     | R STN 9-/C+ 3.4v/60us/130Hz/1042Ω/3.2mA      |
| 063 | L STN 1-/C+ 2.9v/60us/130Hz/1200 Ω/2.423mA   |
|     | R STN 9-/C+ 2.9v/60us/130Hz/1238 Ω/2.338mA   |
| 064 | L STN 3-/C+ 3.0v/60us/130Hz/1081Ω/2.8mA      |
|     | R STN 11-/C+ 3.2v/60us/130Hz/1267Ω/2.8mA     |
| 066 | L STN 3-/C+ 2.90v/60us/130Hz/274Ω/3.3mA      |
|     | R STN 10-/C+ 2.70v/60us/130Hz/976Ω/2.8mA     |
| 070 | L STN 1-/C+ 1.90v/60us/130Hz/1213 Ω/1.5mA    |
|     | R STN 8-/C+ 1.50v/60us/130Hz/1060 Ω/1.4mA    |
| 071 | L STN 2-/C+ 2.15v/60us/130Hz/1424 Ω/1.5mA    |

|     |                                                                                         |
|-----|-----------------------------------------------------------------------------------------|
|     | R STN 10-/c+ 2.15v/60us/130Hz/1138 Ω/1.9mA                                              |
| 072 | L STN 2-/C+ 3.2v/60us/130Hz/969 Ω/3.3mA<br>R STN 10-/C+ 3.0v/60us/130Hz/1006 Ω/3.0mA    |
| 075 | L STN 1-/C+ 2.5v/60us/130Hz/982Ω/2.6mA<br>R STN 9-/C+ 2.5v/60us/130Hz/1391Ω/1.8mA       |
| 076 | L STN 1-/C+ 2.95/60us/130Hz/1445 Ω/2.0mA<br>R STN 9-/C+ 2.15/60us/130Hz/1053 Ω/2.0mA    |
| 077 | L STN 1-/C+ 1.9v/60us/130Hz/1325Ω/1.4mA<br>R STN 9-/C+ 2.2v/60us/130Hz/1285Ω/1.7mA      |
| 078 | L STN 0-/1-/C+ 2.9v/70us/130Hz/1288 Ω/2.2mA<br>R STN 9-/C+ 4.0v/90us/130Hz/1166 Ω/3.4mA |
| 079 | L STN 1-/C+ 1.65v/60us/130Hz/1197 Ω/1.4mA<br>R STN 9-/C+ 2.35v/60us/130Hz/1296 Ω/1.8mA  |
| 080 | L STN 1-/C+ 2.45v/60us/130Hz/1306Ω/1.9mA<br>R STN 10-/C+ 2.65v/60us/130Hz/1067Ω/2.5mA   |
| 082 | L STN 1-/C+ 2.80v/60us/130Hz/1549 Ω/1.8mA<br>R STN 9-/C+ 2.80v/60us/130Hz/1565 Ω/1.7mA  |
| 083 | L STN 1-/C+ 3.3v/60us/130Hz/1521 Ω/2.2mA<br>R STN 9-/C+ 3.3v/60us/130Hz/1236 Ω/2.7mA    |
| 084 | L STN 1-/C+ 2.35v/60us/130hz/1086 Ω/2.1mA<br>R STN 9-/C+ 2.35v/60us/130hz/1086 Ω/1.6mA  |
| 008 | L STN 2-/C+ 2.6v/60us/130Hz/1326 Ω/1.9mA<br>R STN 10-/C+ 2.6v/60us/130Hz/1193 Ω/2.2mA   |
| --- | L STN 0-/C+ 3.4v/60us/130Hz/1202 Ω/2.8mA<br>R STN 8-/C+ 2.9v/60us/130Hz/1083 Ω/2.7mA    |
| 036 | L STN 1-/C+ 2.5v/60us/130Hz/1295 Ω/1.9mA<br>R STN 10-/C+ 2.8v/60us/130Hz/1388 Ω/1.9mA   |
